# Supplementary material for: Chitosan-Modified Biochars to Advance Research on Heavy Metal Ion Removal: Roles, Mechanism and Perspectives
Source: MDPI journal article supplement (doi:10.3390/ma15176108), 2022-09-02
Supplement: s1 [file s1]

**Chitosan-Modified Biochars to Advance Research on Heavy  
Metal Ion Removal: Roles, Mechanism and Perspectives**

Justyna Bąk<sup>1</sup>, Peter Thomas<sup>2</sup>, Dorota Kołodyńska<sup>1</sup>

<sup>1</sup>Department of Inorganic Chemistry, Institute of Chemical Sciences, Faculty of Chemistry, Maria  
Curie-Skłodowska University, Maria Curie-Skłodowska Sq. 2, 20-031, Lublin, Poland,

<sup>2</sup>Earthcare, LLC8524 Southport Drive, Evansville, IN 47711

(a)

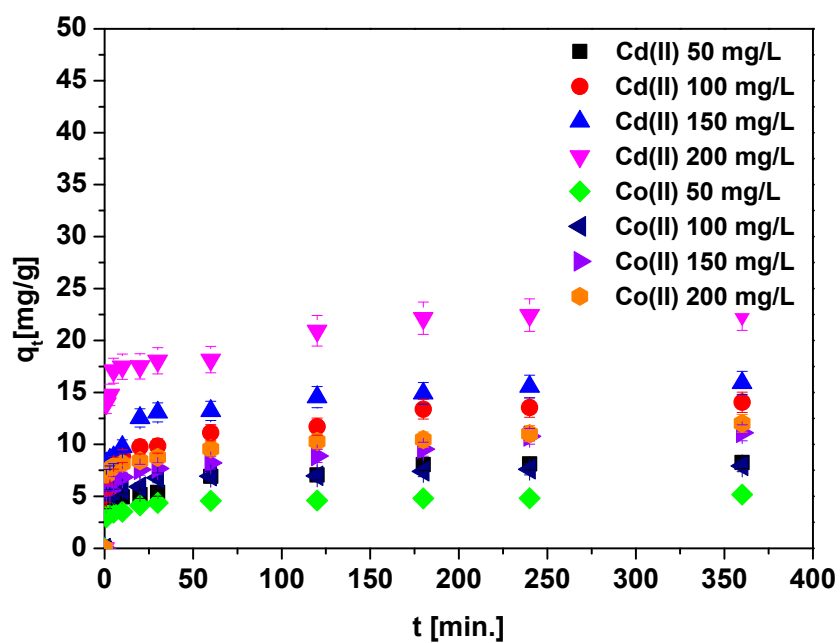

(b)

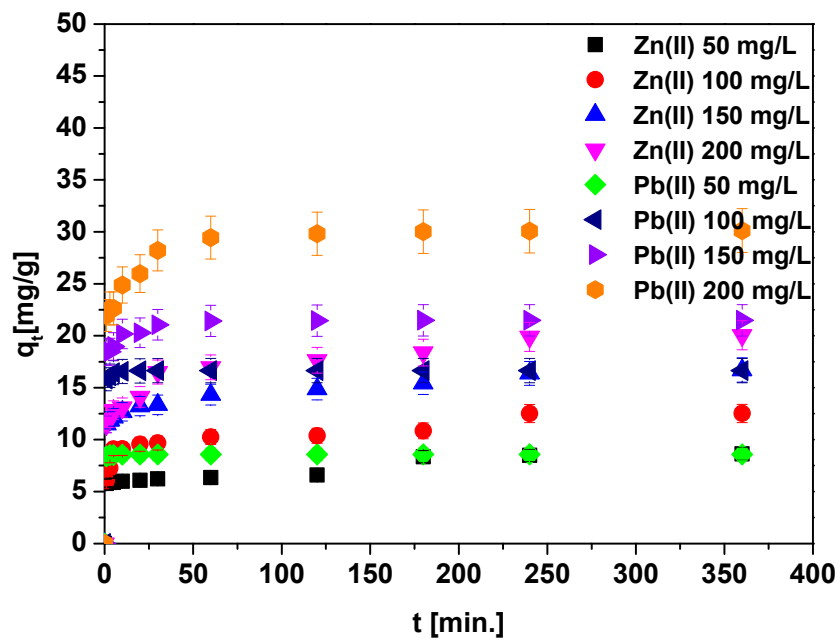

(c)

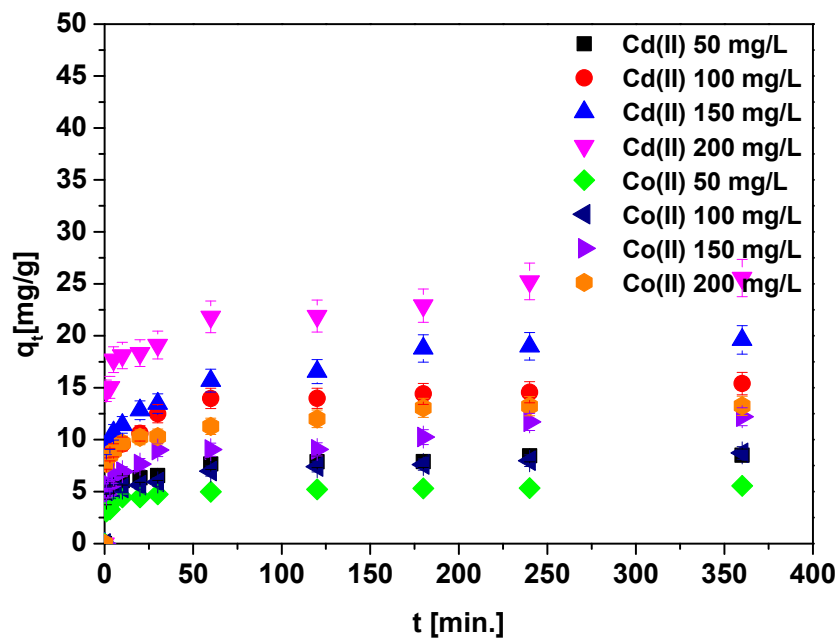

(d)

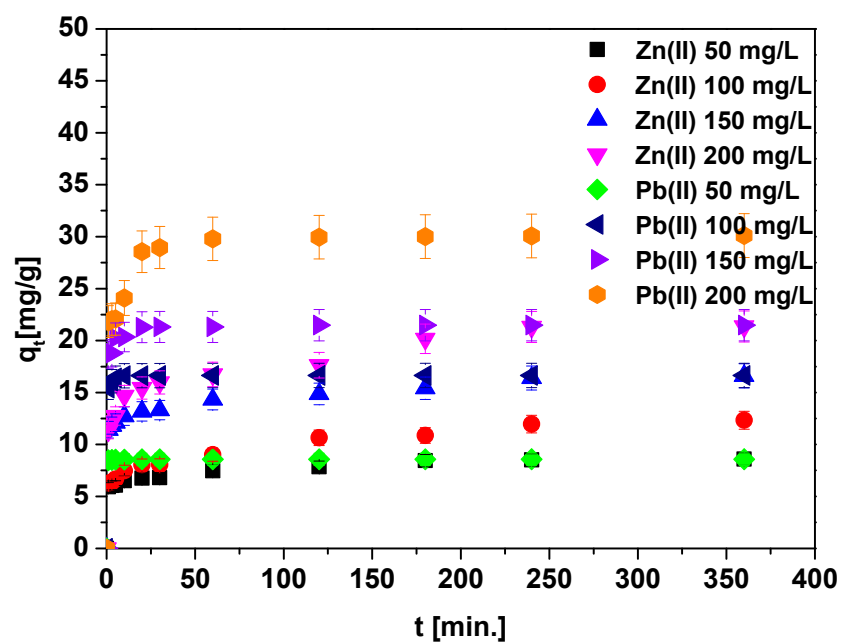

(e)

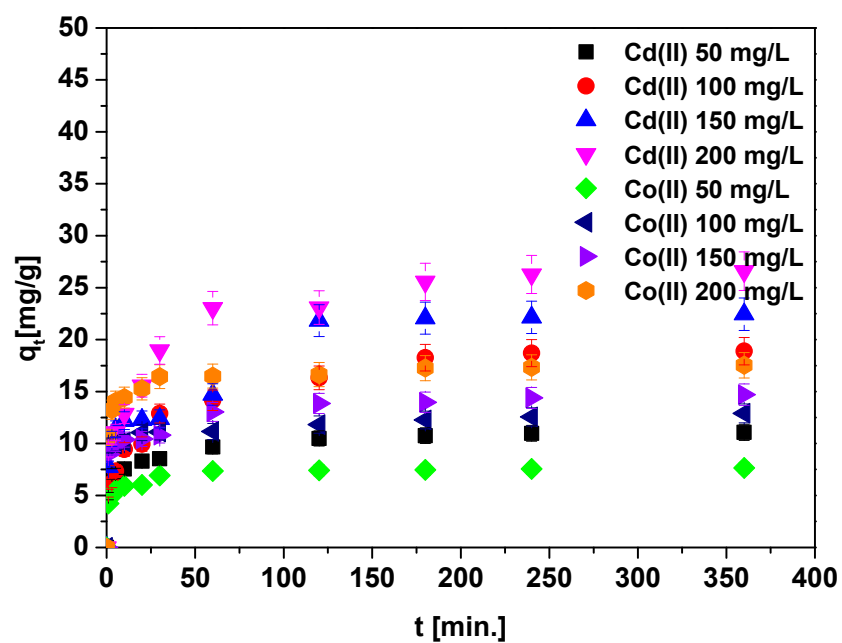

(f)

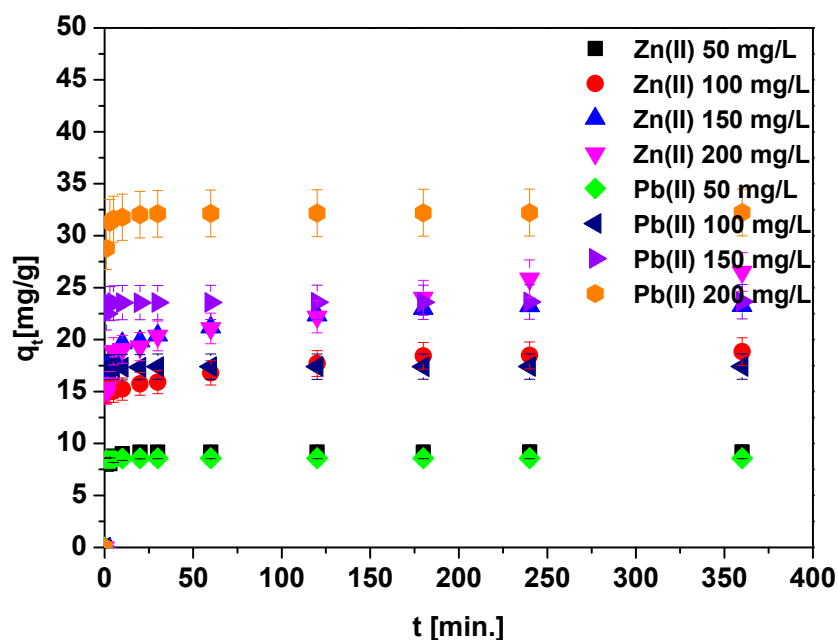

**Figure S1.** Effect of the phase contact time on (a) Cd(II) and Co(II) ions adsorption on BC-CS 1-1, (b) Zn(II) and Pb(II) ions adsorption on BC-CS 1-1, (c) Cd(II) and Co(II) ions adsorption on BC-CS 2-1, (d) Zn(II) and Pb(II) ions adsorption on BC-CS 2-1, (e) Cd(II) and Co(II) ions adsorption on BC-CS 4-1, (f) Zn(II) and Pb(II) ions adsorption on BC-CS 4-1 (pH 5, sorbent mass 0.1 g, shaking speed 180 rpm, temperature 293 K).

(a)

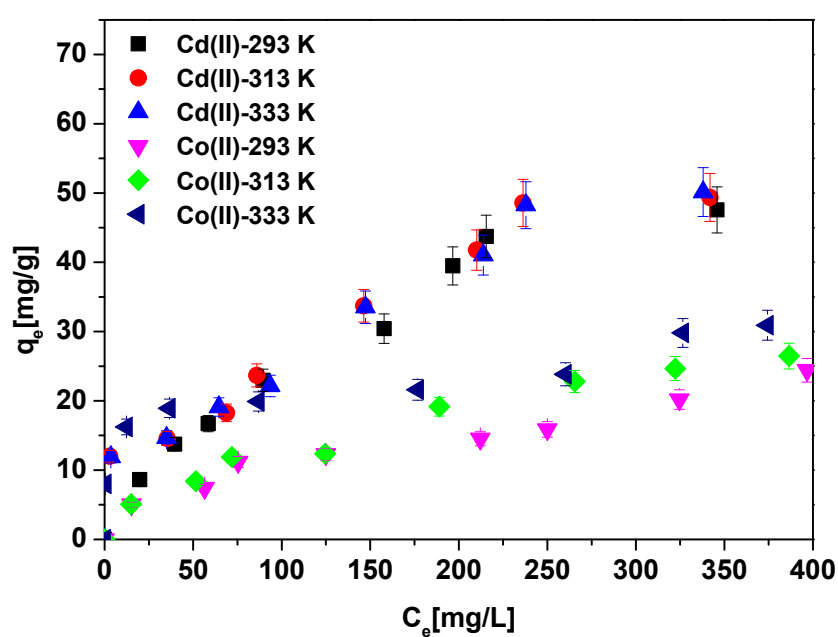

(b)

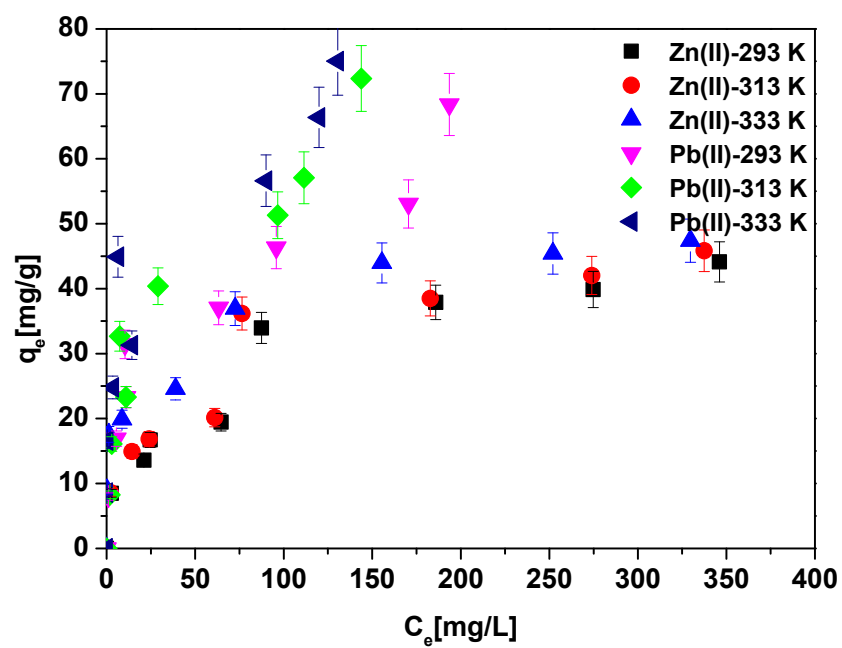

(c)

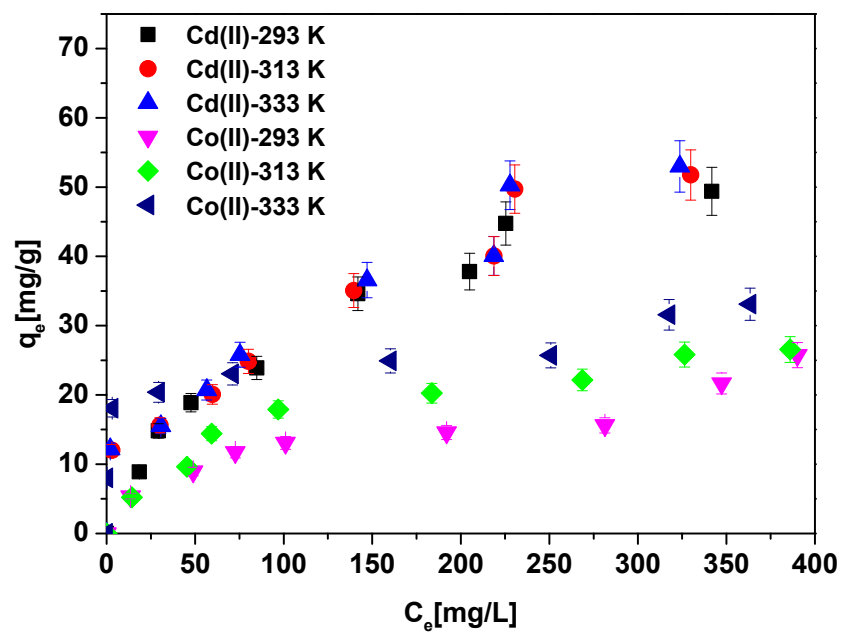

(d)

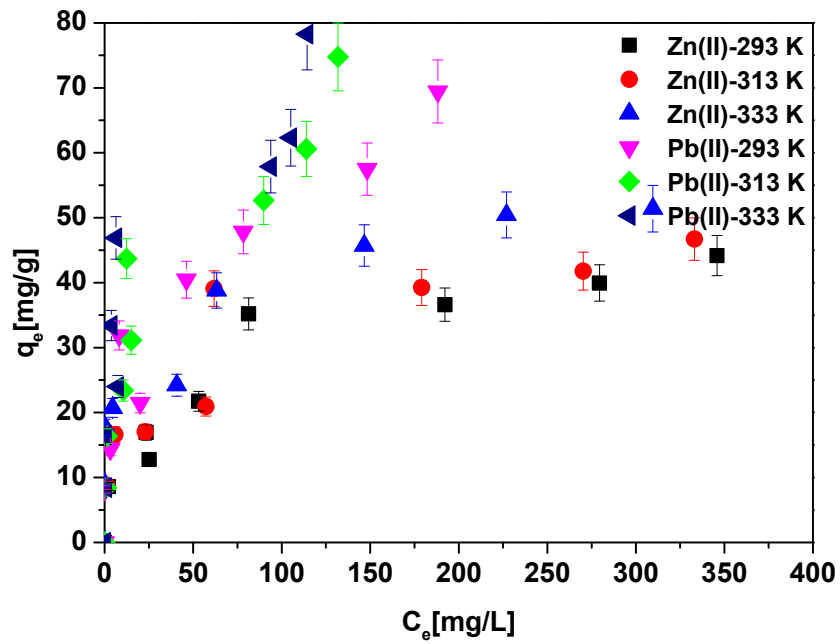

(e)

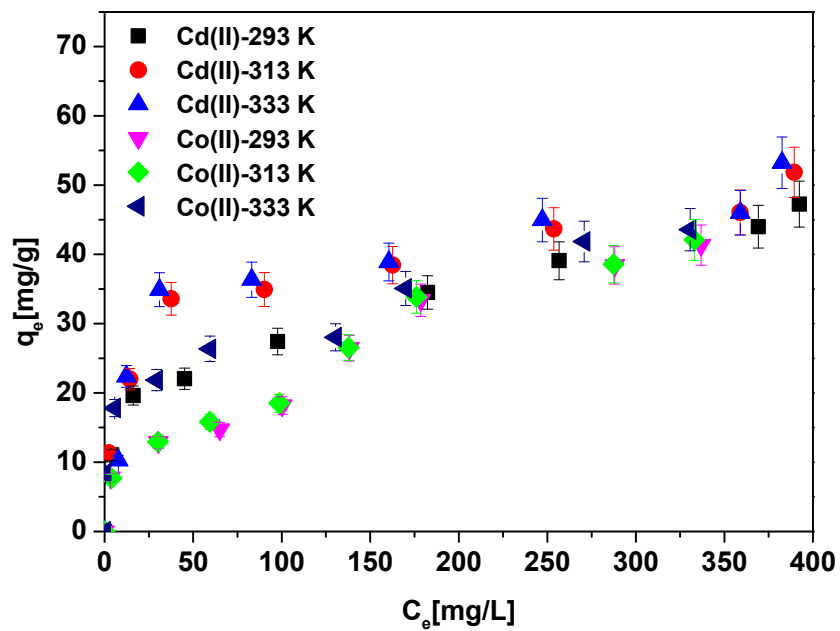

(f)

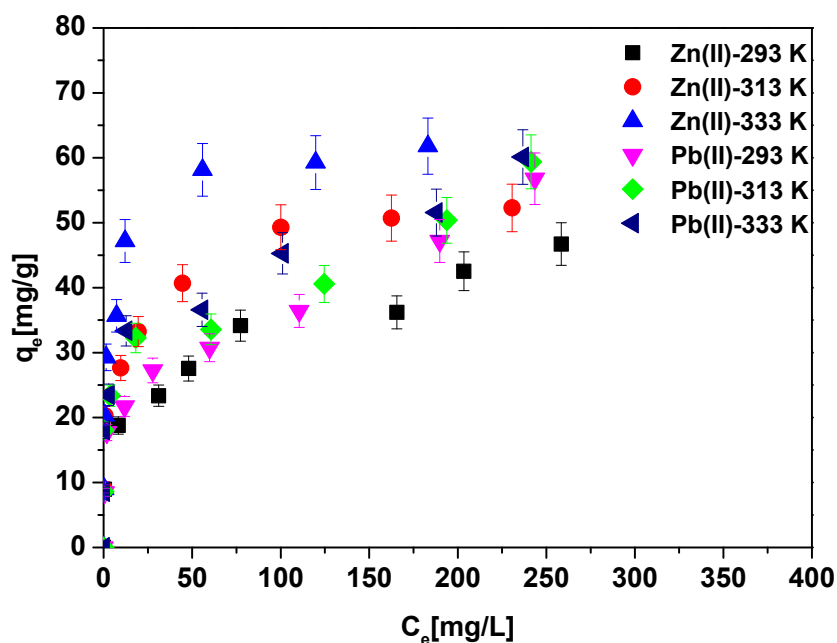

**Figure S2.** Effect of temperature on (a) Cd(II) and Co(II) ions adsorption on BC-CS 1-1, (b) Zn(II) and Pb(II) ions adsorption on BC-CS 1-1, (c) Cd(II) and Co(II) ions adsorption on BC-CS 2-1, (d) Zn(II) and Pb(II) ions adsorption on BC-CS 2-1, (e) Cd(II) and Co(II) ions adsorption on BC-CS 4-1, (f) Zn(II) and Pb(II) ions adsorption on BC-CS 4-1 ( $C_0$  50-600 mg/L, sorbent mass 0.1 g, pH 5, shaking speed 180 rpm).

**Table S1.** Parameters for various adsorption kinetic models for Cu(II), Cd(II), Zn(II) Co(II) and Pb(II) sorption on BC-CS 2-1.

|                          |                  | Parameters                                                                      |                |                |                                                      |                |       |                |                                                      |        |                |
|--------------------------|------------------|---------------------------------------------------------------------------------|----------------|----------------|------------------------------------------------------|----------------|-------|----------------|------------------------------------------------------|--------|----------------|
| C <sub>0</sub><br>[mg/L] | q <sub>exp</sub> | PFO                                                                             |                |                | PSO                                                  |                |       |                | IPD                                                  |        |                |
|                          |                  | log(q <sub>1</sub> -q <sub>t</sub> )=log(q <sub>1</sub> )- $\frac{k_1t}{2.303}$ |                |                | $\frac{t}{q_t} = \frac{1}{k_2q_2^2} + \frac{t}{q_2}$ |                |       |                | q <sub>t</sub> = k <sub>i</sub> t <sup>1/2</sup> + C |        |                |
|                          |                  | q <sub>1</sub>                                                                  | k <sub>1</sub> | R <sup>2</sup> | q <sub>2</sub>                                       | k <sub>2</sub> | h     | R <sup>2</sup> | k <sub>i</sub>                                       | C      | R <sup>2</sup> |
| Cu(II)                   |                  |                                                                                 |                |                |                                                      |                |       |                |                                                      |        |                |
| 50                       | 7.95             | 0.78                                                                            | 0.018          | 0.821          | 7.96                                                 | 0.146          | 9.229 | 1.000          | 0.010                                                | 7.761  | 0.753          |
| 100                      | 14.01            | 5.86                                                                            | 0.010          | 0.875          | 13.93                                                | 0.009          | 1.814 | 0.996          | 0.217                                                | 9.881  | 0.915          |
| 150                      | 18.22            | 10.00                                                                           | 0.013          | 0.930          | 18.36                                                | 0.005          | 1.748 | 0.996          | 0.339                                                | 12.029 | 0.719          |
| 200                      | 24.53            | 13.40                                                                           | 0.011          | 0.972          | 24.68                                                | 0.003          | 2.102 | 0.995          | 0.328                                                | 18.347 | 0.987          |
| Cd(II)                   |                  |                                                                                 |                |                |                                                      |                |       |                |                                                      |        |                |
| 50                       | 8.50             | 3.28                                                                            | 0.015          | 0.887          | 8.53                                                 | 0.021          | 1.541 | 0.999          | 0.101                                                | 6.674  | 0.684          |
| 100                      | 15.40            | 5.45                                                                            | 0.009          | 0.826          | 15.30                                                | 0.011          | 2.548 | 0.999          | 0.128                                                | 12.762 | 0.967          |
| 150                      | 19.61            | 9.39                                                                            | 0.012          | 0.973          | 19.76                                                | 0.006          | 2.147 | 0.997          | 0.151                                                | 16.711 | 0.981          |
| 200                      | 25.56            | 9.69                                                                            | 0.011          | 0.865          | 25.49                                                | 0.006          | 3.581 | 0.996          | 0.438                                                | 17.576 | 0.724          |
| Zn(II)                   |                  |                                                                                 |                |                |                                                      |                |       |                |                                                      |        |                |
| 50                       | 8.59             | 2.71                                                                            | 0.015          | 0.978          | 8.65                                                 | 0.024          | 1.804 | 0.999          | 0.026                                                | 8.098  | 0.962          |

|               |       |       |       |       |       |       |         |       |       |        |       |
|---------------|-------|-------|-------|-------|-------|-------|---------|-------|-------|--------|-------|
| 100           | 12.34 | 5.91  | 0.010 | 0.955 | 12.35 | 0.008 | 1.183   | 0.995 | 0.293 | 7.064  | 0.900 |
| 150           | 16.60 | 4.86  | 0.011 | 0.913 | 16.57 | 0.007 | 3.167   | 0.998 | 0.198 | 12.978 | 0.764 |
| 200           | 21.36 | 10.70 | 0.018 | 0.839 | 21.52 | 0.006 | 2.622   | 0.996 | 0.193 | 17.873 | 0.649 |
| <b>Co(II)</b> |       |       |       |       |       |       |         |       |       |        |       |
| 50            | 5.56  | 1.48  | 0.009 | 0.855 | 5.53  | 0.045 | 1.371   | 0.999 | 0.047 | 4.659  | 0.933 |
| 100           | 8.72  | 3.39  | 0.007 | 0.959 | 8.55  | 0.013 | 0.941   | 0.994 | 0.151 | 5.724  | 0.963 |
| 150           | 12.21 | 6.08  | 0.009 | 0.866 | 12.06 | 0.007 | 1.004   | 0.988 | 0.331 | 6.101  | 0.831 |
| 200           | 13.26 | 5.40  | 0.019 | 0.957 | 13.39 | 0.014 | 2.439   | 0.999 | 0.033 | 12.653 | 0.763 |
| <b>Pb(II)</b> |       |       |       |       |       |       |         |       |       |        |       |
| 50            | 8.57  | 0.04  | 0.016 | 0.829 | 8.57  | 2.583 | 189.909 | 1.000 | 0.001 | 8.557  | 0.701 |
| 100           | 16.64 | 0.10  | 0.028 | 0.673 | 16.65 | 1.231 | 341.215 | 1.000 | 0.001 | 16.641 | 0.960 |
| 150           | 21.49 | 1.22  | 0.042 | 0.910 | 21.51 | 0.142 | 65.564  | 1.000 | 0.001 | 21.486 | 0.979 |
| 200           | 30.10 | 4.45  | 0.022 | 0.858 | 30.22 | 0.025 | 23.151  | 1.000 | 0.017 | 29.791 | 0.959 |

**Table S2.** Parameters for various adsorption kinetic models for Cu(II), Cd(II), Zn(II) Co(II) and Pb(II) sorption on BC-CS 4-1.

| C <sub>0</sub><br>[mg/L] | q <sub>exp</sub> | Parameters                                          |                |                |                |                                                       |         |                |                |                         |                |
|--------------------------|------------------|-----------------------------------------------------|----------------|----------------|----------------|-------------------------------------------------------|---------|----------------|----------------|-------------------------|----------------|
|                          |                  | PFO                                                 |                |                |                | PSO                                                   |         |                |                | IPD                     |                |
|                          |                  | $\log(q_i - q_e) = \log(q_i) - \frac{k_1 t}{2.303}$ |                |                |                | $\frac{t}{q_t} = \frac{1}{k_2 q_2^2} + \frac{t}{q_2}$ |         |                |                | $q_t = k_i t^{1/2} + C$ |                |
|                          |                  | q <sub>1</sub>                                      | k <sub>1</sub> | R <sup>2</sup> | q <sub>2</sub> | k <sub>2</sub>                                        | h       | R <sup>2</sup> | k <sub>i</sub> | C                       | R <sup>2</sup> |
| <b>Cu(II)</b>            |                  |                                                     |                |                |                |                                                       |         |                |                |                         |                |
| 50                       | 9.18             | 0.21                                                | 0.031          | 0.774          | 9.19           | 0.651                                                 | 54.979  | 1.000          | 0.001          | 9.177                   | 0.647          |
| 100                      | 16.90            | 3.50                                                | 0.023          | 0.981          | 16.99          | 0.037                                                 | 10.693  | 1.000          | 0.026          | 16.471                  | 0.682          |
| 150                      | 17.79            | 5.30                                                | 0.014          | 0.876          | 17.87          | 0.015                                                 | 4.896   | 1.000          | 0.071          | 16.429                  | 0.999          |
| 200                      | 25.51            | 13.45                                               | 0.023          | 0.970          | 26.01          | 0.005                                                 | 3.386   | 0.998          | 0.040          | 24.785                  | 0.757          |
| <b>Cd(II)</b>            |                  |                                                     |                |                |                |                                                       |         |                |                |                         |                |
| 50                       | 11.07            | 4.32                                                | 0.016          | 0.984          | 11.18          | 0.017                                                 | 2.098   | 0.999          | 0.053          | 10.088                  | 0.852          |
| 100                      | 18.89            | 12.70                                               | 0.017          | 0.984          | 19.41          | 0.004                                                 | 1.555   | 0.997          | 0.434          | 11.487                  | 0.738          |
| 150                      | 22.45            | 13.46                                               | 0.018          | 0.928          | 23.19          | 0.003                                                 | 1.842   | 0.993          | 0.070          | 21.100                  | 0.961          |
| 200                      | 26.58            | 15.25                                               | 0.016          | 0.966          | 27.09          | 0.002                                                 | 2.729   | 0.998          | 0.174          | 23.355                  | 0.874          |
| <b>Zn(II)</b>            |                  |                                                     |                |                |                |                                                       |         |                |                |                         |                |
| 50                       | 9.18             | 0.21                                                | 0.031          | 0.774          | 9.19           | 0.651                                                 | 54.979  | 1.000          | 0.026          | 8.098                   | 0.962          |
| 100                      | 18.85            | 3.35                                                | 0.011          | 0.980          | 18.86          | 0.015                                                 | 5.408   | 0.999          | 0.293          | 7.064                   | 0.900          |
| 150                      | 23.25            | 5.94                                                | 0.020          | 0.953          | 23.38          | 0.015                                                 | 8.333   | 1.000          | 0.198          | 12.978                  | 0.764          |
| 200                      | 26.51            | 9.67                                                | 0.010          | 0.912          | 26.37          | 0.005                                                 | 3.489   | 0.996          | 0.193          | 17.873                  | 0.649          |
| <b>Co(II)</b>            |                  |                                                     |                |                |                |                                                       |         |                |                |                         |                |
| 50                       | 7.65             | 1.87                                                | 0.014          | 0.841          | 7.67           | 0.044                                                 | 2.618   | 1.000          | 0.032          | 7.047                   | 0.991          |
| 100                      | 12.90            | 2.84                                                | 0.009          | 0.970          | 12.84          | 0.019                                                 | 3.181   | 0.999          | 0.156          | 10.064                  | 0.976          |
| 150                      | 14.70            | 4.97                                                | 0.012          | 0.961          | 14.76          | 0.012                                                 | 2.637   | 0.999          | 0.127          | 12.329                  | 0.945          |
| 200                      | 17.53            | 3.44                                                | 0.013          | 0.878          | 17.54          | 0.004                                                 | 7.263   | 1.000          | 0.051          | 16.559                  | 0.988          |
| <b>Pb(II)</b>            |                  |                                                     |                |                |                |                                                       |         |                |                |                         |                |
| 50                       | 8.58             | 0.06                                                | 0.017          | 0.715          | 8.58           | 2.257                                                 | 166.230 | 1.000          | 0.001          | 8.517                   | 0.956          |
| 100                      | 17.41            | 0.06                                                | 0.010          | 0.685          | 17.41          | 1.406                                                 | 426.102 | 1.000          | 0.001          | 17.388                  | 0.874          |
| 150                      | 23.65            | 0.18                                                | 0.008          | 0.479          | 23.64          | 0.399                                                 | 222.724 | 1.000          | 0.004          | 23.463                  | 0.972          |
| 200                      | 32.23            | 0.61                                                | 0.018          | 0.782          | 32.24          | 0.220                                                 | 229.119 | 1.000          | 0.004          | 32.152                  | 0.982          |



**Table S3.** Adsorption isotherm parameters and correlation coefficients for the adsorption of Cu(II), Cd(II), Zn(II), Co(II) and Pb(II) on BC-CS 2-1.

| Isotherm models                                                                                           | Parameters  | Cu(II) | Cd(II) | Zn(II) | Co(II) | Pb(II) |
|-----------------------------------------------------------------------------------------------------------|-------------|--------|--------|--------|--------|--------|
| <b>Langmuir</b><br>$q_e = \frac{q_0 K_L C_e}{1 + K_L C_e}$                                                | $q_{e,exp}$ | 44.17  | 49.39  | 44.16  | 25.74  | 69.43  |
|                                                                                                           | $q^0$       | 46.99  | 71.44  | 47.67  | 27.13  | 70.35  |
|                                                                                                           | $K_L$       | 0.040  | 0.007  | 0.023  | 0.009  | 0.050  |
|                                                                                                           | $R^2$       | 0.984  | 0.976  | 0.976  | 0.961  | 0.949  |
|                                                                                                           | $K_F$       | 7.44   | 1.72   | 5.86   | 1.87   | 13.29  |
| <b>Freundlich</b><br>$q_e = K_F C_e^{1/n}$                                                                | $1/n$       | 0.327  | 0.609  | 0.344  | 0.405  | 0.296  |
|                                                                                                           | $R^2$       | 0.971  | 0.973  | 0.918  | 0.951  | 0.928  |
|                                                                                                           | $K_T$       | 1.425  | 0.086  | 0.646  | 0.143  | 5.498  |
| <b>Temkin</b><br>$q_e = \frac{RT}{b_T} \ln(k_T C_e)$                                                      | $b_T$       | 353.62 | 167.91 | 329.96 | 490.93 | 301.34 |
|                                                                                                           | $R^2$       | 0.900  | 0.939  | 0.858  | 0.835  | 0.809  |
|                                                                                                           | $q_m$       | 0.0012 | 0.0030 | 0.0012 | 0.0007 | 0.0015 |
| <b>Dubinin-Raduszkiewicz</b><br>$\ln q_e = \ln q_m - \beta \epsilon^2$<br>$E_a = \frac{1}{\sqrt{2\beta}}$ | $\beta$     | 0.0032 | 0.0073 | 0.0036 | 0.0049 | 0.0025 |
|                                                                                                           | $E_a$       | 16.486 | 8.292  | 11.812 | 10.059 | 14.010 |
|                                                                                                           | $R^2$       | 0.953  | 0.974  | 0.887  | 0.939  | 0.899  |
|                                                                                                           |             |        |        |        |        |        |

**Table S4.** Adsorption isotherm parameters and correlation coefficients for the adsorption of Cu(II), Cd(II), Zn(II), Co(II) and Pb(II) on BC-CS 4-1.

| Isotherm models                                                                                           | Parameters  | Cu(II) | Cd(II) | Zn(II) | Co(II) | Pb(II) |
|-----------------------------------------------------------------------------------------------------------|-------------|--------|--------|--------|--------|--------|
| <b>Langmuir</b><br>$q_e = \frac{q_0 K_L C_e}{1 + K_L C_e}$                                                | $q_{e,exp}$ | 43.24  | 47.26  | 46.72  | 41.34  | 58.76  |
|                                                                                                           | $q^0$       | 41.67  | 51.63  | 47.07  | 51.51  | 59.02  |
|                                                                                                           | $K_L$       | 0.042  | 0.014  | 0.044  | 0.009  | 0.047  |
|                                                                                                           | $R^2$       | 0.968  | 0.968  | 0.972  | 0.905  | 0.969  |
|                                                                                                           | $K_F$       | 8.97   | 6.88   | 10.37  | 14.81  | 11.57  |
| <b>Freundlich</b><br>$q_e = K_F C_e^{1/n}$                                                                | $1/n$       | 0.265  | 0.304  | 0.260  | 0.378  | 0.284  |
|                                                                                                           | $R^2$       | 0.962  | 0.954  | 0.970  | 0.902  | 0.960  |
|                                                                                                           | $k_T$       | 38.221 | 0.608  | 4.295  | 0.335  | 3.578  |
| <b>Temkin</b><br>$q_e = \frac{RT}{b_T} \ln(k_T C_e)$                                                      | $b_T$       | 628.87 | 332.14 | 424.50 | 337.14 | 332.63 |
|                                                                                                           | $R^2$       | 0.740  | 0.854  | 0.904  | 0.761  | 0.909  |
|                                                                                                           | $q_m$       | 0.0007 | 0.0011 | 0.0010 | 0.0010 | 0.0013 |
| <b>Dubinin-Raduszkiewicz</b><br>$\ln q_e = \ln q_m - \beta \epsilon^2$<br>$E_a = \frac{1}{\sqrt{2\beta}}$ | $\beta$     | 0.0016 | 0.0033 | 0.0025 | 0.0039 | 0.0027 |
|                                                                                                           | $E_a$       | 17.774 | 12.263 | 14.271 | 11.259 | 16.612 |
|                                                                                                           | $R^2$       | 0.818  | 0.922  | 0.971  | 0.846  | 0.954  |
|                                                                                                           |             |        |        |        |        |        |

**Table S5.** Thermodynamic parameters for the sorption of Cu(II), Cd(II), Zn(II), Co(II) and Pb(II) ions on: BC-CS 2-1.

| Ions   | K <sub>d</sub>  |       |       | ΔH°<br>[kJ/mol] | ΔS°<br>[J/molK] | ΔG°[kJ/mol]     |        |        |
|--------|-----------------|-------|-------|-----------------|-----------------|-----------------|--------|--------|
|        | Temperature [K] |       |       |                 |                 | Temperature [K] |        |        |
|        | 293             | 313   | 333   |                 |                 | 293             | 313    | 333    |
| Cu(II) | 0.173           | 0.201 | 0.237 | 6.34            | 7.12            | -12.56          | -13.91 | -15.13 |
| Cd(II) | 0.145           | 0.157 | 0.164 | 2.53            | -7.40           | -12.12          | -13.16 | -14.11 |
| Zn(II) | 0.128           | 0.140 | 0.166 | 5.29            | 0.79            | -11.81          | -12.86 | -14.15 |
| Co(II) | 0.066           | 0.069 | 0.091 | 6.42            | -1.02           | -10.21          | -11.01 | -12.49 |
| Pb(II) | 0.369           | 0.567 | 0.684 | 12.60           | 34.99           | -14.40          | -16.50 | -18.07 |

**Table S6.** Thermodynamic parameters for the sorption of Cu(II), Cd(II), Zn(II), Co(II) and Pb(II) ions on: BC-CS 4-1.

| Ions   | K <sub>d</sub>  |       |       | ΔH°<br>[kJ/mol] | ΔS°<br>[J/molK] | ΔG°[kJ/mol]     |        |        |
|--------|-----------------|-------|-------|-----------------|-----------------|-----------------|--------|--------|
|        | Temperature [K] |       |       |                 |                 | Temperature [K] |        |        |
|        | 293             | 313   | 333   |                 |                 | 293             | 313    | 333    |
| Cu(II) | 0.222           | 0.557 | 0.601 | 20.52           | 58.55           | -13.16          | -16.46 | -17.71 |
| Cd(II) | 0.121           | 0.133 | 0.139 | 2.94            | -7.50           | -11.67          | -12.73 | -13.66 |
| Zn(II) | 0.180           | 0.227 | 0.337 | 12.57           | 28.39           | -12.66          | -14.11 | -16.12 |
| Co(II) | 0.123           | 0.126 | 0.132 | 1.41            | -12.63          | -11.72          | -12.59 | -13.51 |
| Pb(II) | 0.233           | 0.246 | 0.254 | 1.74            | 6.15            | -13.28          | -14.33 | -15.33 |
